# Supplementary material for: Prestroke Antiplatelet Effect on Symptomatic Intracranial Hemorrhage and Functional Outcome in Intravenous Thrombolysis
Source: PubMed Central journal article supplement — J Stroke. 2016 Sep 30;18(3):344–51. doi: 10.5853/jos.2016.00185 (PMC5066428; doi:10.5853/jos.2016.00185), 2016-09-30
Supplement: jos-2016-00185-supple.pdf [file jos-2016-00185-supple.pdf]

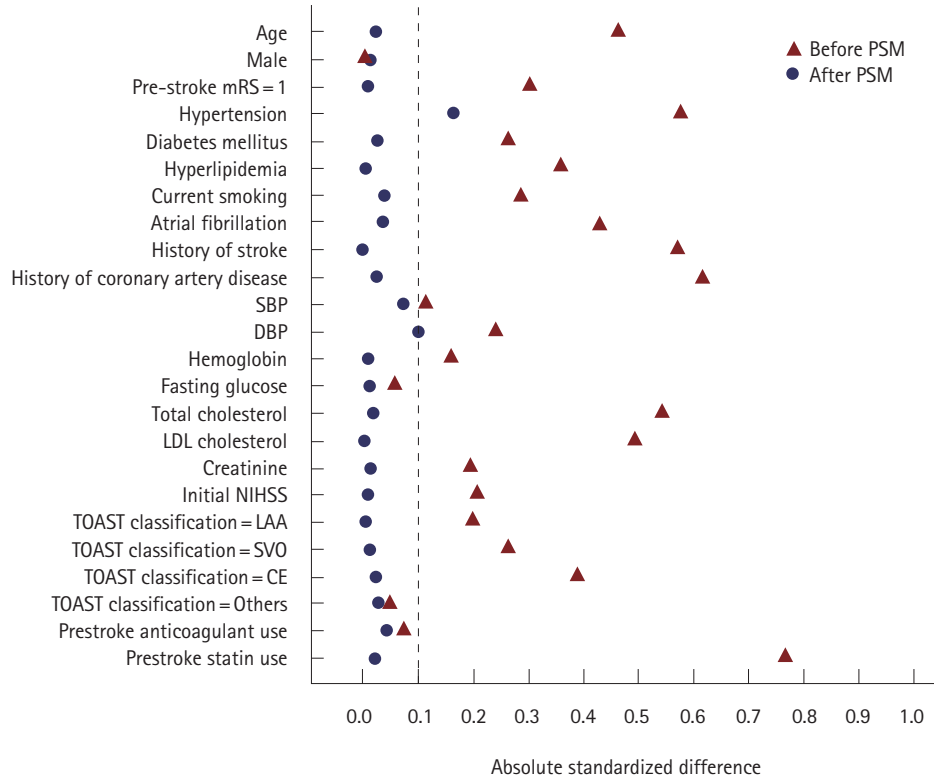

**Supplementary Figure 1.** Absolute standardized difference of covariates before and after propensity score matching. mRS, modified Rankin Scale; SBP, systolic blood pressure; DBP, diastolic blood pressure; LDL, low-density lipoprotein; NIHSS, National Institutes of Health Stroke Scale; TOAST, Trial of Org 10172 in Acute Stroke Treatment; LAA, large-artery atherosclerosis; SVO, small-vessel occlusion; CE, cardioembolism.
